# Supplementary material
Source: PubMed Central journal article supplement (PMC1303830)
Supplement: biophysj_86_1_609__1.pdf [file biophysj_86_1_609__1.pdf]

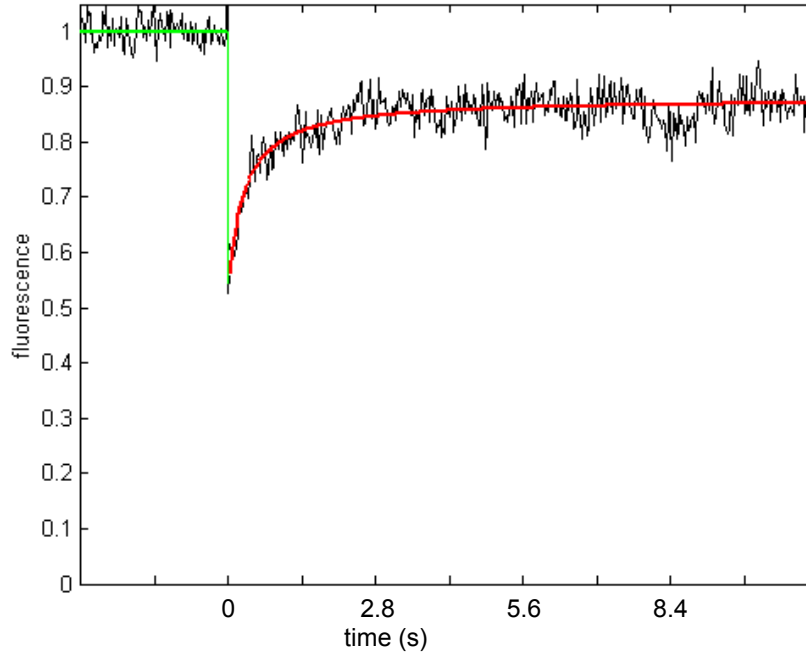

**Figure 5: Representative FRAP curve of eYFP-C10HRas in the membrane of a tsA201 cell.** Fitting using Eq. S1 & S2 resulted in a  $t_{1/2}$  of  $0.28 \pm 0.22$  seconds and a mobile fraction  $\alpha = 0.74 \pm 0.06$ .

The FRAP experiments were conducted on the same microscope system used for single molecule imaging. During the experiments cells were kept in PBS at  $22^\circ\text{C}$ . For FRAP two beams were used: a highly focused, high intensity bleach-beam ( $400 \text{ kW/cm}^2$ , diameter =  $1.68 \text{ }\mu\text{m}$ ) for bleaching and a low intensity beam ( $2 \text{ W/cm}^2$ , FWHM =  $6.5 \text{ }\mu\text{m}$ ) for imaging. Illumination time and time between images were set to 3 ms and 28 ms respectively and kept constant during the experiment. FRAP curves were fit to the equation given by Feder et al (Feder et al., 1996):

$$F(t) = \frac{F_0 + F_\infty \left( \frac{t}{t_{1/2}} \right)}{1 + \left( \frac{t}{t_{1/2}} \right)} \quad (\text{S1})$$

with a mobile fraction,  $\alpha$ , defined as:

$$\alpha = \frac{F_\infty - F_0}{F^0 - F_0} \quad (\text{S2})$$

$F_\infty$  is the fluorescence intensity for infinite times,  $F^0$ , the fluorescence intensity before bleaching and  $F_0$  is the fluorescence intensity immediately after bleaching. The diffusion coefficient was derived from the half time for recovery,  $t_{1/2}$ , using:

$$D_{FRAP} = \beta \cdot \omega^2 / 4t_{1/2} \quad (\text{S3})$$

where  $\omega$  represents the bleach beam radius ( $0.84 \text{ }\mu\text{m}$ ). The bleaching depth parameter  $\beta$  was 1.1 in our experiments, for a bleaching depth of  $58 \pm 11 \%$ . (Axelrod et al., 1976; Yguerabide et al., 1982).

**REFERENCES**

Axelrod, D., D.E.Koppel, J.Schlessinger, E.Elson, and W.W.Webb. 1976. Mobility measurement by analysis of fluorescence photobleaching recovery kinetics. *Biophys. J.* 16:1055-1069.

Feder, T.J., I.Brust-Mascher, J.P.Slattery, B.Baird, and W.W.Webb. 1996. Constrained diffusion or immobile fraction on cell surfaces: a new interpretation. *Biophys. J.* 70:2767-2773.

Yguerabide, J., J.A.Schmidt, and E.E.Yguerabide. 1982. Lateral mobility in membranes as detected by fluorescence recovery after photobleaching. *Biophys. J.* 40:69-75.

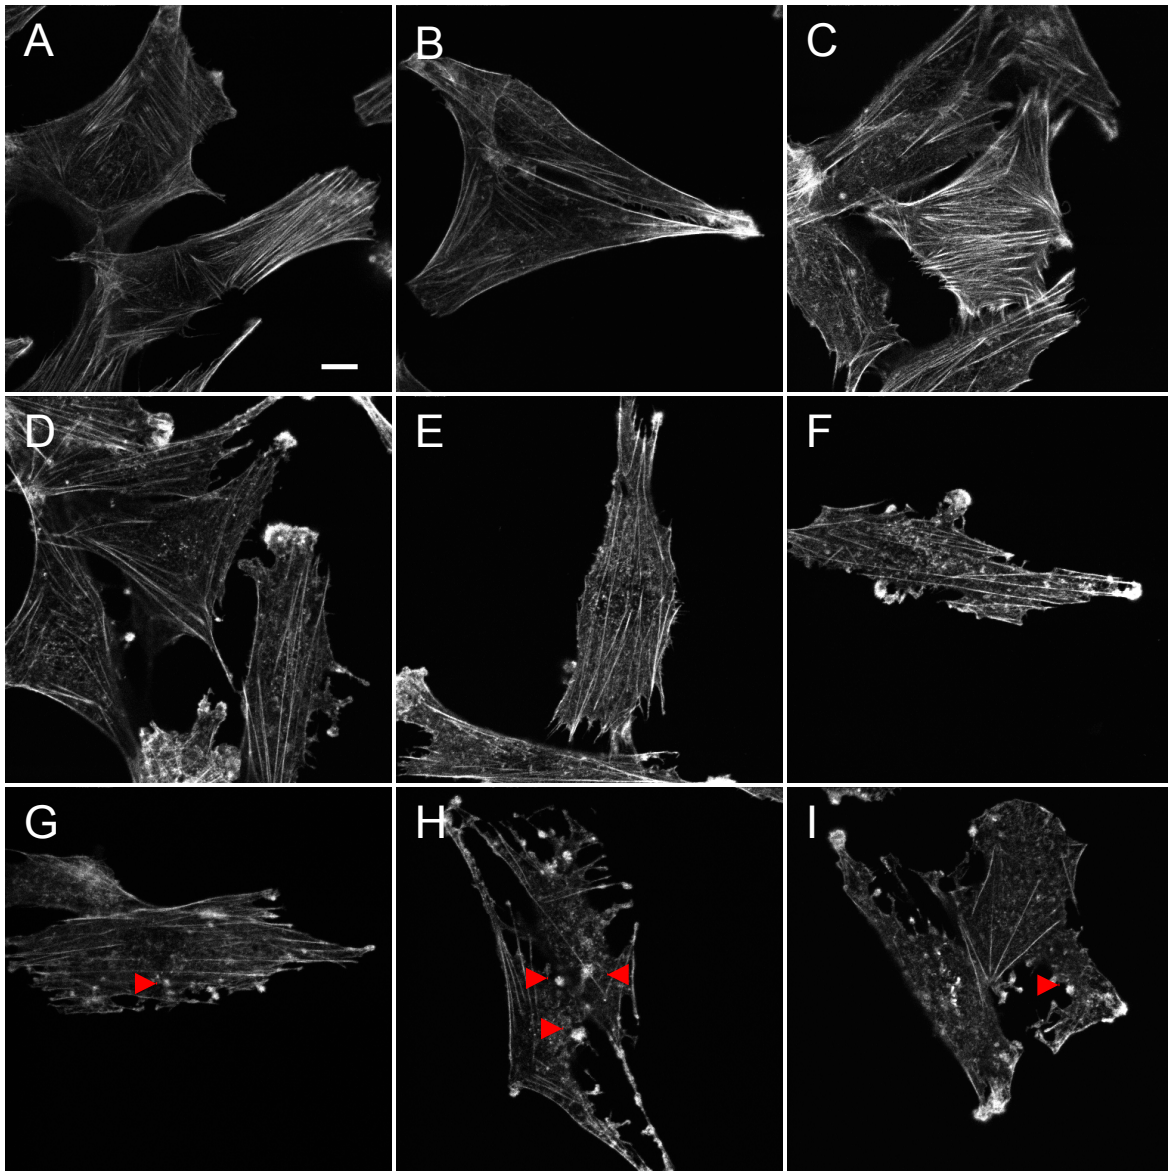

**Figure 6: Changes in the organization of the actin cytoskeleton at various concentrations of latrunculin B.**

3T3-A14 cells were incubated with 0.05% DMSO (A-C), 250 nM latrunculin B (D-F) or 500 nM latrunculin B for 30 minutes at 37°C/5% CO<sub>2</sub>. After these treatments the cells were fixed and stained with Alexa568-phalloidin and imaged by scanning confocal microscopy. Treatment with 500 nM latrunculin B results in significant changes of the actin cytoskeleton. At this concentration small actin aggregates (arrowheads in G-H) coexist with cortical F-actin and less fibers are present. Scale bar: 10  $\mu$ m.

### Cholesterol depletion, membrane isolation and cholesterol quantification

Eight 100 mm dishes with 3T3-A14 cells were grown to ~80% confluency. Cells were incubated overnight in serum-free medium. In four dishes, the medium was replaced by serum-free medium containing 5 mM methyl- $\beta$ -cyclodextrin and subsequently incubated 1 hour at 37°C/5% CO<sub>2</sub>. The other four dishes with cells in serum-free medium were used as control. Cells were washed twice with PBS and detached by scraping in cold homogenization buffer: 20 mM Tris-HCl, pH 7.6, containing 10mM MgCl<sub>2</sub> and Protease Inhibitor Cocktail (cØmplete Mini EDTA free, Roche Diagnostics). 1 ml of buffer was used for 4 dishes. All of the subsequent procedures were carried out at 4 °C. The cell suspension was freeze-thawed (-80°C) 3 times and briefly sonicated with a tip-sonicator to further break up the cells (on ice). Total cell membranes (pellet) and cytosol (supernatant) were obtained by a 10 minute centrifugation in an Eppendorf centrifuge at 13000 rpm.

The pellet was resuspended in 0.1 ml of PBS + 0.5% NP40 (Non-idet). To obtain a completely resuspended total cell membrane extract, the pellet was sonicated in a bath sonicator (filled with ice-water) and regularly vortexed, to obtain a homogeneous solution. The cholesterol content of the solution was measured immediately after homogeneity was reached. The free cholesterol content was measured using the WACO free cholesterol-C kit (Waco Chemicals GmbH, Neuss, Germany), using the manufacturers instructions.

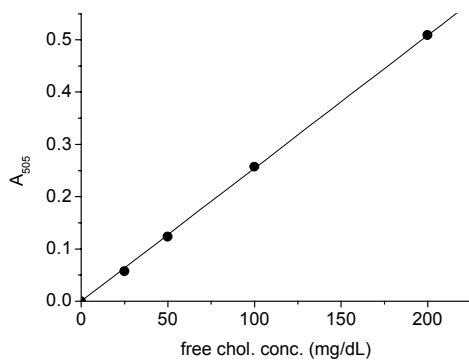

**Figure 7: Calibration curve of absorption at 505 nm versus the free cholesterol content.**

**Table 2: cholesterol content of the total cell membrane preparations**

| <i>Total cell membrane</i> | <i>A<sub>505</sub></i> |
|----------------------------|------------------------|
| Control                    | 0.108                  |
| Cholesterol extracted      | 0.046                  |

As the same weight of cell membrane material is used for both samples this means a reduction in cholesterol content of  $57 \pm 5$  %.

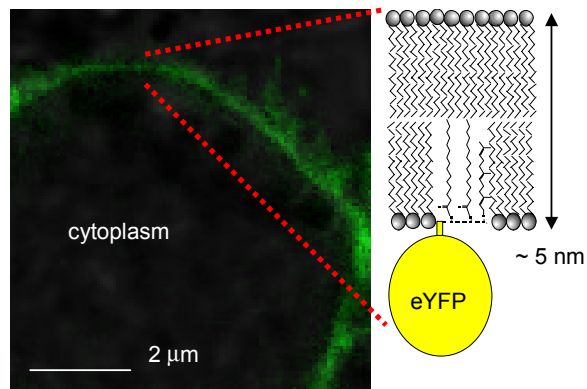

**Figure 8: Confocal fluorescence image of a tsA201 cell showing clear plasma membrane localization of eYFP-C10HRas.** Image was taken 48 hours after transfection of the cell with DNA encoding eYFP-C10HRas. The drawing on the right shows the schematic structure of the eYFP-C10HRas protein at the plasma membrane.
